# Supplementary material for: Prevalence of Product Claims and Marketing Buzzwords Found on Health Food Snack Products Does Not Relate to Nutrient Profile
Source: Nutrients. 2020 May 22;12(5):1513. doi: 10.3390/nu12051513 (PMC7284863; doi:10.3390/nu12051513)
Supplement: Supplementary file 1 [file nutrients-12-01513-s001.pdf]

**Table S1.** Product category and subcategory descriptions.

| Product category                 | Category description                                                                                                                           |
|----------------------------------|------------------------------------------------------------------------------------------------------------------------------------------------|
| <b>Beverages, all</b>            |                                                                                                                                                |
| <i>Beverages, fermented</i>      | Kombucha, kefir and other pro/pre-biotic beverages                                                                                             |
| <i>Beverages, fruit-based</i>    | Juice and other beverages where fruit is the main ingredient                                                                                   |
| <i>Beverages, milk-based</i>     | Smoothies, flavoured milk, iced coffee and other beverages where milk is the main ingredient                                                   |
| <i>Beverages, protein</i>        | Specifically declared high protein beverages and other diet/sports beverages                                                                   |
| <b>Chips, all</b>                |                                                                                                                                                |
| <i>Chips, extruded</i>           | All chips made from cereal flours, legume flours, vegetable flours or starches                                                                 |
| <i>Chips, grain-based</i>        | Corn chips, chips where the main ingredient is wheat, rice or oats and popcorn                                                                 |
| <i>Chips, potato</i>             | All vegetable chips, including potato, sweet potato, beetroot and broccoli, all legume chips, including chickpea and fava bean and fruit chips |
| <b>Chocolate, all</b>            | All chocolates, including chocolate coated nuts and dried fruit                                                                                |
| <b>Confectionary, all</b>        | Lollies, licorice, toffees, sugar coated nuts and dried fruit                                                                                  |
| <b>Savoury biscuits, all</b>     | Plain and flavoured rice crackers and crispbreads                                                                                              |
| <b>Snack bars, all</b>           |                                                                                                                                                |
| <i>Snack bars, cereal-based</i>  | Snack bars where cereals are the main ingredient e.g., oats                                                                                    |
| <i>Snack bars, fruit-based</i>   | Snack bars where fruit is the main ingredient e.g., dates                                                                                      |
| <i>Snack bars, nut-based</i>     | Snack bars where nuts or seeds are the main ingredient                                                                                         |
| <i>Snack bars, protein-based</i> | Snack bars specifically declared as high protein, or sold as a sports nutrition or diet bar                                                    |
| <b>Sweet biscuits, all</b>       |                                                                                                                                                |
| <i>Sweet biscuits, chocolate</i> | All chocolate biscuits and chocolate coated biscuits                                                                                           |
| <i>Sweet biscuits, other</i>     | All other types of biscuits including plain shortbread and cream filled                                                                        |

**Table S2.** Product claim categories.

| Product claim category         | Category description                                                                                                                                                    |
|--------------------------------|-------------------------------------------------------------------------------------------------------------------------------------------------------------------------|
| <b>Nutrient content claim*</b> | Any claim indicating the presence or absence of a nutrient or bioactive substance, for example 'no added sugar', 'low sodium', '97% fat free' etc.                      |
| <b>Health claim*</b>           | Any claim that claims a relationship between a nutrient and an effect on health or between a nutrient and a disease, for example 'fibre for a healthy digestive system' |
| <b>'Buzzword'</b>              | Any other claim that does not refer to a nutrient or effect on health, for example 'organic', 'raw', 'natural', 'vegan' etc.                                            |

\*According to the FSANZ definitions.

**Table S3.** Comparative analysis of median unit cost (\$/100g) between health food (HF) snack products sold in supermarkets and specialty HF stores compared to equivalent products sold in regular aisles (RA) of supermarkets.

|                         | N    | RA<br>Median (IQR)<br>(\$/100g) | N    | HF<br>Median (IQR)<br>(\$/100g) | p-value |
|-------------------------|------|---------------------------------|------|---------------------------------|---------|
| <b>All categories</b>   | 1251 | 1.68(1.66)                      | 1110 | 5.94(5.14)                      | <0.001* |
| <b>Beverages</b>        | 143  | 0.89(0.45)                      | 95   | 1.21(0.28)                      | <0.001* |
| <b>Chips</b>            | 108  | 1.89(1.84)                      | 194  | 4.47(3.68)                      | <0.001* |
| <b>Chocolate</b>        | 222  | 3.02(1.75)                      | 181  | 8.80(5.45)                      | <0.001* |
| <b>Confectionary</b>    | 242  | 1.73(4.13)                      | 40   | 6.11(4.80)                      | <0.001* |
| <b>Savoury biscuits</b> | 167  | 1.95(1.7)                       | 119  | 4.00(2.30)                      | <0.001* |
| <b>Snack bars</b>       | 174  | 2.4(0.88)                       | 385  | 7.00(3.33)                      | <0.001* |
| <b>Sweet biscuits</b>   | 195  | 1.58(1.11)                      | 96   | 2.92(2.69)                      | <0.001* |

\*Denotes p-value <0.001. Regular foods abbreviated to RF. Health foods abbreviated to HF.
